# Supplementary material for: Rate and risk factors of kidney function decline among South Asians with type 2 diabetes: analysis of the CARRS Trial
Source: PubMed Central journal article supplement (PMC11409274; doi:10.1136/bmjdrc-2024-004218), 2024-08-16
Supplement: bmjdrc-12-4-s001.pdf [file bmjdrc-12-4-s001.pdf]

## Supplementary Tables

**eTable 1:** Mean eGFR, creatinine and Urine to Albumin Creatinine ratio over the period by intervention and usual care group.

| eGFR                                  | Overall |               |                   | Usual Care |               |                   | n   | Intervention  |                   |
|---------------------------------------|---------|---------------|-------------------|------------|---------------|-------------------|-----|---------------|-------------------|
|                                       | N       | Mean (SD)     | Median (IQR)      | N          | Mean (SD)     | Median (IQR)      |     | Mean (SD)     | Median (IQR)      |
| Baseline                              | 1146    | 82.6 (21)     | 83.6 (67.7, 97.9) | 571        | 81.3 (20.9)   | 82 (66.8, 97.2)   | 575 | 83.9 (21.1)   | 85.5 (68.7, 99.2) |
| 12m                                   | 996     | 82.4 (20.7)   | 84.3 (68.2, 98.5) | 502        | 81.6 (21.4)   | 82.9 (67.2, 97.3) | 494 | 83.3 (19.9)   | 84.9 (68.7, 99.4) |
| 24m                                   | 490     | 82.3 (20.8)   | 83.9 (69.5, 97.8) | 246        | 83.7 (21)     | 87.3 (70.1, 99.2) | 244 | 80.9 (20.5)   | 82.7 (68.5, 96.8) |
| 36m                                   | 953     | 78.8 (21)     | 79.6 (64.9, 95.4) | 474        | 79.4 (20.5)   | 80.8 (65.4, 95.8) | 479 | 78.2 (21.5)   | 78.6 (64.5, 95.1) |
| <b>Creatinine</b>                     |         |               |                   |            |               |                   |     |               |                   |
| (mg/dL)                               |         |               |                   |            |               |                   |     |               |                   |
| Baseline                              | 1146    | 0.98 (.68)    | 0.9 (.8, 1.1)     | 571        | 1 (.86)       | 0.9 (.8, 1.1)     | 575 | .94 (.43)     | 0.9 (.8, 1)       |
| 12m                                   | 996     | 0.97 (.49)    | 0.9 (.8, 1)       | 502        | 1 (.64)       | 0.9 (.8, 1.1)     | 494 | .93 (.24)     | 0.9 (.8, 1)       |
| 24m                                   | 490     | 0.98 (.59)    | 0.9 (.8, 1.1)     | 246        | 1 (.78)       | 0.9 (.8, 1.1)     | 244 | .96 (.27)     | 0.9 (.8, 1.1)     |
| 36m                                   | 953     | 1 (.44)       | 0.91 (.8, 1.1)    | 474        | 1 (.44)       | 0.9 (.8, 1.1)     | 479 | 1 (.45)       | 0.93 (.8, 1.1)    |
| <b>Urine Albumin Creatinine ratio</b> |         |               |                   |            |               |                   |     |               |                   |
| (mg/g)                                |         |               |                   |            |               |                   |     |               |                   |
| Baseline                              | 1146    | 66.6 (283.6)  | 7.9 (0.1, 59.9)   | 571        | 70.6 (335.5)  | 8.1 (0.1, 63.0)   | 571 | 62.6 (220.4)  | 7.6 (0.2, 58.0)   |
| 12m                                   | 987     | 79.4 (322.8)  | 15.5 (2.5, 69.0)  | 498        | 66.9 (216.7)  | 15.8 (1.9, 68.5)  | 489 | 92.2 (402.9)  | 15.4 (3.3, 69.0)  |
| 24m                                   | 488     | 143.6 (603.6) | 19.0 (4.4, 69.2)  | 244        | 137.2 (537.0) | 18.6 (4.3, 62.3)  | 244 | 150.0 (664.5) | 20.0 (4.6, 76.0)  |
| 36m                                   | 931     | 96.8 (327.7)  | 17.0 (4.6, 70.0)  | 463        | 88.5 (286.3)  | 17.0 (4.6, 69.8)  | 468 | 105.0 (364.1) | 17.0 (4.5, 70.5)  |

Data is presented as mean (SD) or median (IQR Q1, Q3)

SD, standard deviation; IQR, Interquartile range; eGFR, Estimated glomerular filtration rate.

**eTable 2:** Factors associated with greater decline in eGFR slope (-2.0 ml/min/1.73m<sup>2</sup>) in the CARRS Trial

|                                  | n    | eGFR slope > -<br>2.0 | eGFR slope ≤ -<br>2.0 | Unadjusted<br>Risk ratio<br>(95% CI) | p-value | Adjusted^<br>Risk ratio<br>(95% CI) | p-<br>value | Adjusted#<br>Risk ratio<br>(95% CI) | p-value |
|----------------------------------|------|-----------------------|-----------------------|--------------------------------------|---------|-------------------------------------|-------------|-------------------------------------|---------|
| Overall                          | 1146 | 313 (27.3)            | 833 (72.7)            |                                      |         |                                     |             |                                     |         |
| Age category                     |      |                       |                       |                                      |         |                                     |             |                                     |         |
| 35-44                            | 185  | 45 (24.3)             | 140 (75.7)            | 1.0                                  |         | 1.0                                 |             | 1.0                                 |         |
| 45-64                            | 802  | 226 (28.2)            | 576 (71.8)            | 1.16 (0.88, 1.53)                    | 0.298   | 1.07 (0.77, 1.5)                    | 0.678       | 1.07 (0.77, 1.49)                   | 0.693   |
| ≥65                              | 159  | 42 (26.4)             | 117 (73.6)            | 1.09 (0.76, 1.56)                    | 0.656   | 1.04 (0.67,<br>1.62)                | 0.853       | 1.03 (0.66, 1.61)                   | 0.881   |
| Sex                              |      |                       |                       |                                      |         |                                     |             |                                     |         |
| Female                           | 619  | 176 (28.4)            | 443 (71.6)            | 1.0                                  |         | 1.0                                 |             | 1.0                                 |         |
| Male                             | 527  | 137 (26)              | 390 (74)              | 0.91 (0.76, 1.11)                    | 0.357   | 0.9 (0.7, 1.15)                     | 0.399       | 0.93 (0.72, 1.2)                    | 0.555   |
| Education                        |      |                       |                       |                                      |         |                                     |             |                                     |         |
| Up to primary schooling          | 337  | 93 (27.6)             | 244 (72.4)            | 1.0                                  |         | 1.0                                 |             | 1.0                                 |         |
| Secondary                        | 499  | 143 (28.7)            | 356 (71.3)            | 1.04 (0.83, 1.3)                     | 0.739   | 1.03 (0.78,<br>1.36)                | 0.839       | 1.03 (0.78, 1.36)                   | 0.829   |
| College graduate & above         | 303  | 77 (25.4)             | 226 (74.6)            | 0.92 (0.71, 1.19)                    | 0.533   | 0.9 (0.65, 1.26)                    | 0.543       | 0.9 (0.65, 1.25)                    | 0.532   |
| Duration of diabetes at baseline |      |                       |                       |                                      |         |                                     |             |                                     |         |
| < 7years                         | 537  | 131 (24.4)            | 406 (75.6)            | 1.0                                  |         | 1.0                                 |             | 1.0                                 |         |
| ≥7 years                         | 595  | 177 (29.7)            | 418 (70.3)            | 1.22 (1, 1.48)                       | 0.044   | 1.08 (0.84, 1.4)                    | 0.543       | 1.08 (0.84, 1.4)                    | 0.551   |
| CVD at baseline                  |      |                       |                       |                                      |         |                                     |             |                                     |         |
| No                               | 1068 | 283 (26.5)            | 785 (73.5)            | 1.0                                  |         | 1.0                                 |             | 1.0                                 |         |
| Yes                              | 78   | 30 (38.5)             | 48 (61.5)             | 1.45 (1.08, 1.96)                    | 0.014   | 1.40 (0.94,<br>2.07)                | 0.098       | 1.38 (0.93, 2.05)                   | 0.111   |
| PVD at baseline                  |      |                       |                       |                                      |         |                                     |             |                                     |         |
| No                               | 1080 | 288 (26.7)            | 792 (73.3)            | 1.0                                  |         | 1.0                                 |             | 1.0                                 |         |
| Yes                              | 66   | 25 (37.9)             | 41 (62.1)             | 1.42 (1.03, 1.96)                    | 0.034   | 1.19 (0.77,<br>1.84)                | 0.425       | 1.19 (0.77, 1.83)                   | 0.44    |
| Retinopathy at baseline          |      |                       |                       |                                      |         |                                     |             |                                     |         |
| No                               | 1046 | 275 (26.3)            | 771 (73.7)            | 1.0                                  |         | 1.0                                 |             | 1.0                                 |         |
| Yes                              | 100  | 38 (38)               | 62 (62)               | 1.45 (1.1, 1.89)                     | 0.008   | 1.09 (0.74, 1.6)                    | 0.655       | 1.10 (0.75, 1.61)                   | 0.63    |

|                                           |      |            |            |                   |       |                   |       |                   |       |
|-------------------------------------------|------|------------|------------|-------------------|-------|-------------------|-------|-------------------|-------|
| Neuropathy at baseline                    |      |            |            |                   |       |                   |       |                   |       |
| No                                        | 766  | 203 (26.5) | 563 (73.5) | 1.0               |       | 1.0               |       | 1.0               |       |
| Yes                                       | 380  | 110 (28.9) | 270 (71.1) | 1.09 (0.9, 1.33)  | 0.379 | 1.01 (0.79, 1.3)  | 0.922 | 1.02 (0.79, 1.31) | 0.889 |
| Current smoker at baseline                |      |            |            |                   |       |                   |       |                   |       |
| No                                        | 1112 | 303 (27.2) | 809 (72.8) | 1.0               |       | 1.0               |       | 1.0               |       |
| Yes                                       | 34   | 10 (29.4)  | 24 (70.6)  | 1.08 (0.64, 1.83) | 0.777 | 1.11 (0.58, 2.12) | 0.762 | 1.1 (0.58, 2.11)  | 0.771 |
| Hba1c % at baseline                       |      |            |            |                   |       |                   |       |                   |       |
| <9                                        | 383  | 101 (26.4) | 282 (73.6) | 1.0               |       | 1.0               |       | 1.0               |       |
| >=9                                       | 763  | 212 (27.8) | 551 (72.2) | 1.05 (0.86, 1.29) | 0.613 | 1.00 (0.78, 1.28) | 0.975 | 0.99 (0.78, 1.27) | 0.968 |
| Systolic Blood pressure (mmHg)at baseline |      |            |            |                   |       |                   |       |                   |       |
| <140                                      | 350  | 98 (28)    | 252 (72)   | 1.0               |       | 1.0               |       | 1.0               |       |
| >=140                                     | 796  | 215 (27)   | 581 (73)   | 0.96 (0.79, 1.18) | 0.728 | 1.1 (0.79, 1.55)  | 0.567 | 1.11 (0.79, 1.56) | 0.547 |
| LDL-c (mmHg)at baseline                   |      |            |            |                   |       |                   |       |                   |       |
| <130                                      | 604  | 155 (25.7) | 449 (74.3) | 1.0               |       | 1.0               |       | 1.0               |       |
| >=130                                     | 542  | 158 (29.2) | 384 (70.8) | 1.14 (0.94, 1.37) | 0.186 | 1.24 (0.92, 1.68) | 0.157 | 1.25 (0.92, 1.69) | 0.15  |
| BMI (Kg/m2 ) category at baseline         |      |            |            |                   |       |                   |       |                   |       |
| < 18.5                                    | 13   | 9 (69.2)   | 4 (30.8)   | 1.22 (0.52, 2.88) | 0.644 | 1.24 (0.44, 3.48) | 0.687 | na                |       |
| 18.5-22.9                                 | 171  | 128 (74.9) | 43 (25.1)  | 1.0               |       | 1.0               |       |                   |       |
| 23-24.9                                   | 183  | 127 (69.4) | 56 (30.6)  | 1.22 (0.87, 1.71) | 0.255 | 1.17 (0.78, 1.75) | 0.451 |                   |       |
| >= 25                                     | 779  | 569 (73)   | 210 (27)   | 1.07 (0.81, 1.42) | 0.63  | 1.07 (0.76, 1.5)  | 0.703 |                   |       |
| Waist circumference                       |      |            |            |                   |       |                   |       |                   |       |
| (<80 cm (women), < 90 cm (men)            | 185  | 140 (75.7) | 45 (24.3)  | 1.07 (0.81, 1.42) | 0.63  | 1                 |       |                   |       |
| (≥80 cm (women), ≥ 90 cm (men)            | 961  | 693 (72.1) | 268 (27.9) | 1.07 (0.81, 1.42) | 1.63  | 1.15 (0.87, 1.51) | 0.328 | 1.11 (0.79, 1.57) | 0.538 |
| Blood pressure medication at baseline     |      |            |            |                   |       |                   |       |                   |       |
| No                                        | 432  | 121 (28)   | 311 (72)   | 1.0               |       | 1.0               |       | 1.0               |       |
| Yes                                       | 714  | 192 (26.9) | 522 (73.1) | 0.96 (0.79, 1.17) | 0.68  | 0.91 (0.7, 1.19)  | 0.494 | 0.9 (0.69, 1.17)  | 0.432 |

|                                   |     |            |            |                   |       |                   |       |                   |       |
|-----------------------------------|-----|------------|------------|-------------------|-------|-------------------|-------|-------------------|-------|
| ACEi/ ARB at baseline             |     |            |            |                   |       |                   |       |                   |       |
| No                                | 829 | 233 (28.1) | 596 (71.9) | 1.0               |       | na                |       | na                |       |
| Yes                               | 317 | 80 (25.2)  | 237 (74.8) | 0.90 (0.72, 1.12) | 0.334 |                   |       |                   |       |
| Statins at baseline               |     |            |            |                   |       |                   |       |                   |       |
| No                                | 467 | 113 (24.2) | 354 (75.8) | 1.0               |       | 1.0               |       | 1.0               |       |
| Yes                               | 679 | 200 (29.5) | 479 (70.5) | 1.22 (1, 1.48)    | 0.052 | 1.15 (0.9, 1.45)  | 0.264 | 1.14 (0.9, 1.44)  | 0.284 |
| Insulin use at baseline           |     |            |            |                   |       |                   |       |                   |       |
| No                                | 653 | 160 (24.5) | 493 (75.5) | 1.0               |       | 1.0               |       | 1.0               |       |
| Yes                               | 493 | 153 (31)   | 340 (69)   | 1.27 (1.05, 1.53) | 0.014 | 1.17 (0.91, 1.49) | 0.224 | 1.18 (0.92, 1.5)  | 0.199 |
| Urine Albumin to creatinine ratio |     |            |            |                   |       |                   |       |                   |       |
| <30                               | 765 | 572 (74.8) | 193 (25.2) | 1.0               |       | 1.0               |       | 1.0               |       |
| 30-299.99                         | 338 | 240 (71)   | 98 (29)    | 1.15 (0.93, 1.41) | 0.187 | 1.18 (0.92, 1.53) | 0.194 | 1.19 (0.92, 1.54) | 0.183 |
| >=300                             | 43  | 21 (48.8)  | 22 (51.2)  | 2.03 (1.48, 2.78) | 0     | 1.73 (1.07, 2.8)  | 0.026 | 1.74 (1.07, 2.82) | 0.025 |

# adjusted for the treatment group and each of the other covariates listed in the model (excluding waist circumference)
